# Supplementary material for: Combining signal and sequence to detect RNA polymerase initiation in ATAC-seq data
Source: PLOS journal article supplement (doi:10.1371/journal.pone.0232332), 2020-04-30
Supplement: S9 (10.1371/journal.pone.0232332.s009) [file journal.pone.0232332.s009]

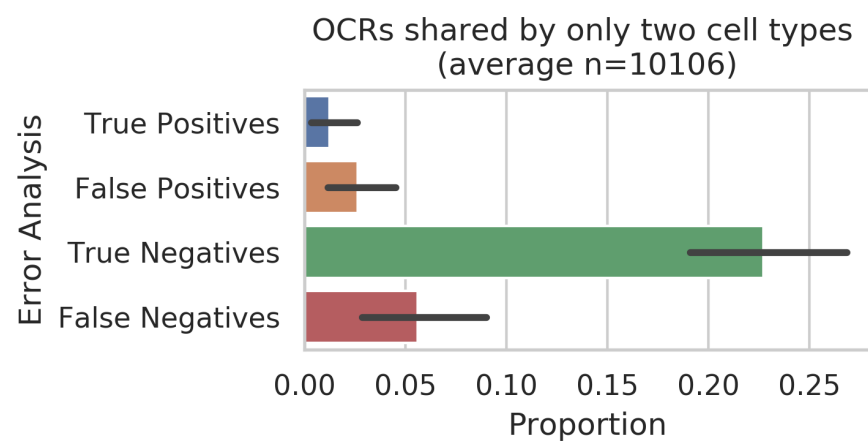

Figure 7: **Classification outcomes for OCRs shared by only two cell types.** Proportion of OCRs shared by just two cell types (overlapping in genomic coordinates) categorized in the different performance metrics.
